# Supplementary material
Source: PubMed Central journal article supplement (PMC6728188)
Supplement: NIHMS1535881-supplement-1.pdf [file NIHMS1535881-supplement-1.pdf]

**Table S1 Correlation matrix for beta values measured by five monitors in the Greater Boston area (Pearson Correlation)**

| <b>Location of monitors</b> | <b>Boston, Ma</b> | <b>Concord, Nh</b> | <b>Hartford, Ct</b> | <b>Providence, Ri</b> | <b>Worcester, Ma</b> |
|-----------------------------|-------------------|--------------------|---------------------|-----------------------|----------------------|
| Boston, Ma                  | 1                 |                    |                     |                       |                      |
| Concord, Nh                 | 0.611             | 1                  |                     |                       |                      |
| Hartford, Ct                | 0.533             | 0.632              | 1                   |                       |                      |
| Providence, Ri              | 0.536             | 0.329              | 0.455               | 1                     |                      |
| Worcester, Ma               | 0.736             | 0.579              | 0.642               | 0.553                 | 1                    |

All coefficients have a p-value <0.05

**Table S2 Associations between average particle radioactivity levels and the relative odds of chronic kidney diseases (CKD)**

| Particle radioactivity levels |    | Odds of CKD (N <sub>case</sub> =746) |         |
|-------------------------------|----|--------------------------------------|---------|
|                               |    | Odds ratio (95% CI)                  | p-value |
| Exposure window (days)        | 1  | 1.02 (0.88 – 1.18)                   | 0.788   |
|                               | 7  | 1.11 (0.95 – 1.29)                   | 0.194   |
|                               | 14 | 1.09 (0.94 – 1.26)                   | 0.277   |
|                               | 21 | 1.12 (0.96 – 1.30)                   | 0.143   |
|                               | 28 | 1.15 (0.99 – 1.34)                   | 0.062   |

Model adjusted for age (years), total cholesterol, triglycerides, HDL, SBP, DBP, season of medical visits (spring/ summer/ fall/ winter), temperature (°C), relative humidity (%), BMI (underweight or normal weight/ overweight/ obese), smoking status (current/ former/ never smoker), alcohol intake (<2 drinks per day versus 2+ drinks per day), hypertension, stroke, coronary heart disease (CHD), and diabetes diagnosed by physicians (yes/no)

**Table S3 Associations of particle reactivity and air pollutants with renal function (eGFR) in the exposure window of 28 days as estimated by CKD-EPI and MDRD**

| 1) eGFR (CKD-EPI)      |                        |                |                |         |                |                |         |  |
|------------------------|------------------------|----------------|----------------|---------|----------------|----------------|---------|--|
| Exposure window (days) | Included air pollutant | PR             |                |         | Air pollutant  |                |         |  |
|                        |                        | Change per IQR | Standard error | p-value | Change per IQR | Standard error | p-value |  |
| 1                      | \                      | -0.84          | 0.2887         | 0.0037  |                |                |         |  |
| 7                      | \                      | -0.9051        | 0.3081         | 0.0034  |                |                |         |  |
| 14                     | \                      | -0.6439        | 0.3217         | 0.0455  |                |                |         |  |
| 21                     | \                      | -0.7267        | 0.3297         | 0.0277  |                |                |         |  |
| 28                     | \                      | -0.8298        | 0.3232         | 0.0104  |                |                |         |  |
| 1                      | PM <sub>2.5</sub>      | -0.7814        | 0.3114         | 0.0122  | -0.565         | 0.4512         | 0.2109  |  |
| 7                      | PM <sub>2.5</sub>      | -0.6358        | 0.3824         | 0.0966  | -1.0108        | 0.5331         | 0.0584  |  |
| 14                     | PM <sub>2.5</sub>      | -0.4369        | 0.3886         | 0.2611  | -1.3536        | 0.6082         | 0.0264  |  |
| 21                     | PM <sub>2.5</sub>      | -0.4673        | 0.3931         | 0.2348  | -1.3822        | 0.6416         | 0.0316  |  |
| 28                     | PM <sub>2.5</sub>      | -0.5718        | 0.3893         | 0.1421  | -1.5108        | 0.6613         | 0.0227  |  |
| 1                      | BC                     | -0.7502        | 0.3266         | 0.0218  | -0.5006        | 0.308          | 0.1044  |  |
| 7                      | BC                     | -0.9507        | 0.3563         | 0.0077  | -0.4032        | 0.4029         | 0.3171  |  |
| 14                     | BC                     | -0.6043        | 0.3678         | 0.1007  | -0.2316        | 0.4108         | 0.573   |  |
| 21                     | BC                     | -0.5194        | 0.3779         | 0.1695  | -0.1043        | 0.4066         | 0.7976  |  |
| 28                     | BC                     | -0.5863        | 0.3682         | 0.1116  | -0.08463       | 0.4171         | 0.8393  |  |
| 2) eGFR (MDRD)         |                        |                |                |         |                |                |         |  |
| Exposure window (days) | Included air pollutant | PR             |                |         | Air pollutant  |                |         |  |
|                        |                        | Change per IQR | Standard error | p-value | Change per IQR | Standard error | p-value |  |
| 1                      | \                      | -1.027         | 0.3331         | 0.0021  |                |                |         |  |
| 7                      | \                      | -1.0189        | 0.355          | 0.0042  |                |                |         |  |
| 14                     | \                      | -0.6472        | 0.3706         | 0.0809  |                |                |         |  |
| 21                     | \                      | -0.7741        | 0.3798         | 0.0417  |                |                |         |  |
| 28                     | \                      | -0.9324        | 0.3722         | 0.0124  |                |                |         |  |
| 1                      | PM <sub>2.5</sub>      | -0.9856        | 0.3595         | 0.0062  | -0.599         | 0.5197         | 0.2495  |  |
| 7                      | PM <sub>2.5</sub>      | -0.6561        | 0.4406         | 0.1367  | -1.3431        | 0.6096         | 0.0279  |  |
| 14                     | PM <sub>2.5</sub>      | -0.3585        | 0.4478         | 0.4235  | -1.5362        | 0.6967         | 0.0278  |  |
| 21                     | PM <sub>2.5</sub>      | -0.4499        | 0.4532         | 0.321   | -1.7964        | 0.7335         | 0.0146  |  |
| 28                     | PM <sub>2.5</sub>      | -0.5871        | 0.4486         | 0.1908  | -1.9939        | 0.7552         | 0.0085  |  |
| 1                      | BC                     | -0.949         | 0.3754         | 0.0116  | -0.5775        | 0.3529         | 0.1021  |  |
| 7                      | BC                     | -1.0062        | 0.409          | 0.014   | -0.5212        | 0.4598         | 0.2573  |  |
| 14                     | BC                     | -0.597         | 0.4223         | 0.1577  | -0.2008        | 0.4691         | 0.6686  |  |
| 21                     | BC                     | -0.5731        | 0.4338         | 0.1868  | -0.03627       | 0.4642         | 0.9377  |  |
| 28                     | BC                     | -0.6999        | 0.4227         | 0.098   | 0.00144        | 0.4761         | 0.9976  |  |

PR = particle radioactivity; BC = black carbon

**Table S4 Associations of particle radioactivity levels with renal function (eGFR) and the relative odds of chronic kidney diseases (CKD) stratified by CRP and fibrinogen levels (same-day to 21-day average levels)**

**1) Same-day exposure**

| Exposures                 |                  | eGFR (CKD-EPI)      |         | eGFR (MDRD)       |         | Odds of CKD                           |                     |         |
|---------------------------|------------------|---------------------|---------|-------------------|---------|---------------------------------------|---------------------|---------|
|                           |                  | Change per IQR (SE) | p-value | Coefficients (SE) | p-value | N <sub>case</sub> /N <sub>Total</sub> | Odds ratio (95% CI) | p-value |
| <b>CRP (mg/L)</b>         |                  |                     |         |                   |         |                                       |                     |         |
|                           | 1 (<0.91 )       | -0.592 (0.515)      | 0.251   | -0.956 (0.616)    | 0.121   | 189/810                               | 1.02 (0.76 – 1.38)  | 0.887   |
| <b>Tertile</b>            | 2 (0.91 ~ <2.25) | -0.678 (0.581)      | 0.244   | -0.902 (0.639)    | 0.159   | 247/809                               | 1.16 (0.86 – 1.57)  | 0.321   |
|                           | 3 (≥2.25)        | -1.376 (0.581)      | 0.019   | -1.333 (0.689)    | 0.002   | 298/808                               | 1.17 (0.79 – 1.36)  | 0.834   |
| <b>Fibrinogen (mg/dL)</b> |                  |                     |         |                   |         |                                       |                     |         |
|                           | 1 (<302)         | -0.022 (0.667)      | 0.973   | -0.089 (0.731)    | 0.904   | 179/679                               | 0.93 (0.73 – 1.19)  | 0.567   |
| <b>Tertile</b>            | 2 (302 ~ <362)   | -1.113 (0.542)      | 0.041   | -1.536 (0.649)    | 0.019   | 203/675                               | 1.08 (0.84 – 1.40)  | 0.535   |
|                           | 3 (≥362)         | -1.507 (0.593)      | 0.012   | -1.854 (0.705)    | 0.009   | 258/677                               | 1.23 (0.92 – 1.65)  | 0.159   |

**2) 7-day cumulative exposure**

| Exposures                 |                  | eGFR (CKD-EPI)      |         | eGFR (MDRD)       |         | Odds of CKD                           |                     |         |
|---------------------------|------------------|---------------------|---------|-------------------|---------|---------------------------------------|---------------------|---------|
|                           |                  | Change per IQR (SE) | p-value | Coefficients (SE) | p-value | N <sub>case</sub> /N <sub>Total</sub> | Odds ratio (95% CI) | p-value |
| <b>CRP (mg/L)</b>         |                  |                     |         |                   |         |                                       |                     |         |
|                           | 1 (<0.91 )       | 0.405 (0.558)       | 0.468   | 0.185 (0.669)     | 0.783   | 189/810                               | 0.99 (0.71 – 1.38)  | 0.96    |
| <b>Tertile</b>            | 2 (0.91 ~ <2.25) | -1.246 (0.623)      | 0.046   | -1.139 (0.739)    | 0.124   | 247/809                               | 1.21 (0.95 – 1.53)  | 0.121   |
|                           | 3 (≥2.25)        | -1.756 (0.601)      | 0.004   | -1.914 (0.661)    | 0.004   | 298/808                               | 1.24 (0.90 – 1.74)  | 0.191   |
| <b>Fibrinogen (mg/dL)</b> |                  |                     |         |                   |         |                                       |                     |         |
|                           | 1 (<302)         | -1.072 (0.570)      | 0.061   | -1.491 (0.680)    | 0.029   | 179/679                               | 1.06 (0.78 – 1.45)  | 0.697   |
| <b>Tertile</b>            | 2 (302 ~ <362)   | -1.295 (0.685)      | 0.06    | -1.571 (0.711)    | 0.041   | 203/675                               | 1.10 (0.83 – 1.45)  | 0.512   |
|                           | 3 (≥362)         | -1.345 (0.707)      | 0.059   | -1.611 (0.774)    | 0.039   | 258/677                               | 1.39 (1.02 – 1.88)  | 0.036   |

3) 14-day cumulative exposure

| Exposures                 | eGFR (CKD-EPI)      |                | eGFR (MDRD)       |                | Odds of CKD                           |                     |                    |       |
|---------------------------|---------------------|----------------|-------------------|----------------|---------------------------------------|---------------------|--------------------|-------|
|                           | Change per IQR (SE) | p-value        | Coefficients (SE) | p-value        | N <sub>case</sub> /N <sub>Total</sub> | Odds ratio (95% CI) | p-value            |       |
| <b>CRP (mg/L)</b>         |                     |                |                   |                |                                       |                     |                    |       |
| Tertile                   | 1 (<0.91 )          | 0.328 (0.557)  | 0.556             | 0.004 (0.669)  | 0.995                                 | 189/810             | 1.02 (0.74 – 1.41) | 0.906 |
|                           | 2 (0.91 ~ <2.25)    | -0.918 (0.627) | 0.144             | -0.761 (0.743) | 0.306                                 | 247/809             | 1.20 (0.93 – 1.56) | 0.167 |
|                           | 3 (≥2.25)           | -1.913 (0.680) | 0.005             | -2.016 (0.746) | 0.007                                 | 298/808             | 1.27 (0.94 – 1.74) | 0.121 |
| <b>Fibrinogen (mg/dL)</b> |                     |                |                   |                |                                       |                     |                    |       |
| Tertile                   | 1 (<302)            | -0.741 (0.603) | 0.22              | -1.027 (0.721) | 0.155                                 | 179/679             | 1.09 (0.83 – 1.44) | 0.524 |
|                           | 2 (302 ~ <362)      | -1.176 (0.687) | 0.089             | -1.431 (0.816) | 0.081                                 | 203/675             | 1.08 (0.81 – 1.46) | 0.591 |
|                           | 3 (≥362)            | -1.472 (0.764) | 0.055             | -1.769 (0.836) | 0.036                                 | 258/677             | 1.39 (1.02 – 1.90) | 0.039 |

4) 21-day cumulative exposure

| Exposures                 | eGFR (CKD-EPI)      |                | eGFR (MDRD)       |                | Odds of CKD                           |                     |                    |       |
|---------------------------|---------------------|----------------|-------------------|----------------|---------------------------------------|---------------------|--------------------|-------|
|                           | Change per IQR (SE) | p-value        | Coefficients (SE) | p-value        | N <sub>case</sub> /N <sub>Total</sub> | Odds ratio (95% CI) | p-value            |       |
| <b>CRP (mg/L)</b>         |                     |                |                   |                |                                       |                     |                    |       |
| Tertile                   | 1 (<0.91 )          | 0.309 (0.567)  | 0.586             | -0.534 (0.727) | 0.986                                 | 189/810             | 1.05 (0.77 – 1.44) | 0.749 |
|                           | 2 (0.91 ~ <2.25)    | -1.105 (0.639) | 0.085             | -0.972 (0.758) | 0.201                                 | 247/809             | 1.20 (0.92 – 1.58) | 0.186 |
|                           | 3 (≥2.25)           | -2.070 (0.702) | 0.003             | -2.351 (0.769) | 0.002                                 | 298/808             | 1.35 (1.01 – 1.81) | 0.043 |
| <b>Fibrinogen (mg/dL)</b> |                     |                |                   |                |                                       |                     |                    |       |
| Tertile                   | 1 (<302)            | -0.460 (0.609) | 0.451             | -0.534 (0.727) | 0.464                                 | 179/679             | 1.14 (0.87 – 1.50) | 0.334 |
|                           | 2 (302 ~ <362)      | -0.894 (0.659) | 0.177             | -1.106 (0.785) | 0.161                                 | 203/675             | 1.09 (0.82 – 1.45) | 0.545 |
|                           | 3 (≥362)            | -1.861 (0.792) | 0.02              | -2.326 (0.867) | 0.008                                 | 258/677             | 1.38 (1.01 – 1.89) | 0.041 |

CRP = C-reactive protein;

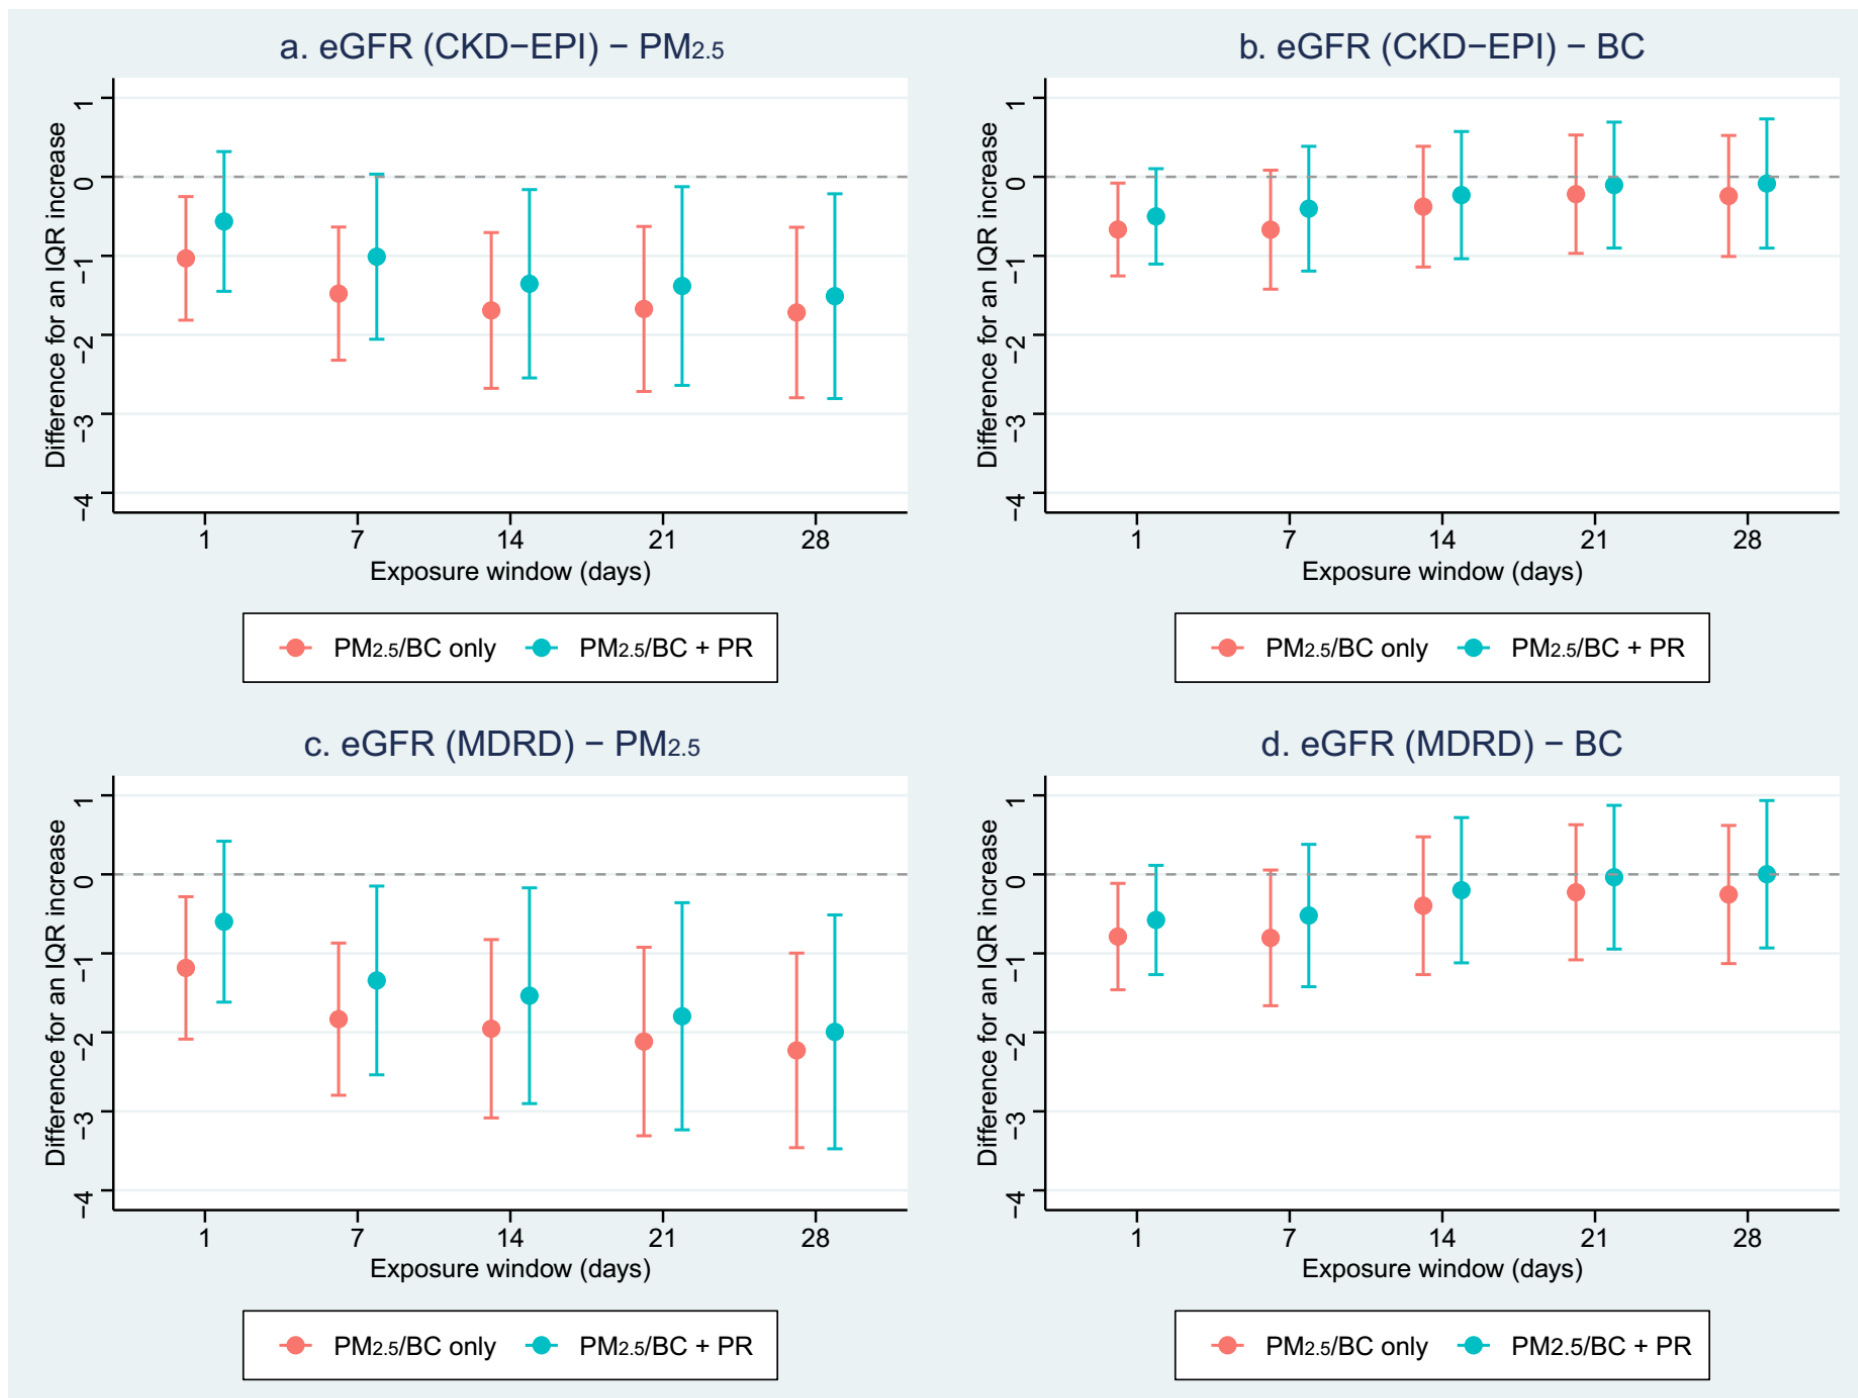

**Figure S1** Associations of air pollution with kidney function in the exposure window of 28 days with and without controlling for particle radioactivity

## Figure legend

PR: particle radioactivity; BC: black carbon; eGFR: estimated glomerular filtration rate

Dots: Point estimates; Error bars: Confidence intervals;

Red: Model with PM<sub>2.5</sub> or black carbon only;

Blue: Model with particle radioactivity and PM<sub>2.5</sub>/black carbon;
